# Supplementary material
Source: ML conference proceedings conference paper supplement (https://proceedings.mlr.press/v108/soori20a.html)
Supplement: Supplementary file 1 [file soori20a-supp.pdf]

## A Supplementary Material

### A.1 The proposed DAve-QN method with exact time indices

---

**Algorithm 2** Illustration of the DAve-QN Algorithm

---

| Master:                                                                                                                                                                                                                                                                                                                                                                                                                                                                                                                                                                                                                                                                                                                                                                                                                                                                                                                                                                                                                                                                                                                                                                                  | Worker $i$ :                                                                                                                                                                                                                                                                                                                                                                                                                                                                                                                                                                                                                                                                                                                                                                                                                                                                                                                                                                         |
|------------------------------------------------------------------------------------------------------------------------------------------------------------------------------------------------------------------------------------------------------------------------------------------------------------------------------------------------------------------------------------------------------------------------------------------------------------------------------------------------------------------------------------------------------------------------------------------------------------------------------------------------------------------------------------------------------------------------------------------------------------------------------------------------------------------------------------------------------------------------------------------------------------------------------------------------------------------------------------------------------------------------------------------------------------------------------------------------------------------------------------------------------------------------------------------|--------------------------------------------------------------------------------------------------------------------------------------------------------------------------------------------------------------------------------------------------------------------------------------------------------------------------------------------------------------------------------------------------------------------------------------------------------------------------------------------------------------------------------------------------------------------------------------------------------------------------------------------------------------------------------------------------------------------------------------------------------------------------------------------------------------------------------------------------------------------------------------------------------------------------------------------------------------------------------------|
| <pre> Initialize <math>\mathbf{x}</math>, <math>\mathbf{B}_i</math>, <math>\mathbf{g} = \sum_{i=1}^n \nabla f_i(\mathbf{x})</math>, <math>\mathbf{B}^{-1} = (\sum_{i=1}^n \mathbf{B}_i)^{-1}</math>, <math>\mathbf{u} = \sum_{i=1}^n \mathbf{B}_i \mathbf{x}</math>, for <math>t = 1</math> to <math>T - 1</math> do   If a worker sends an update:   Receive <math>\Delta \mathbf{u}</math>, <math>\mathbf{y}</math>, <math>\mathbf{q}</math>, <math>\alpha</math>, <math>\beta</math> from it   <math>\mathbf{u} = \mathbf{u} + \Delta \mathbf{u}</math>, <math>\mathbf{g} = \mathbf{g} + \mathbf{y}</math>, <math>\mathbf{v} = (\mathbf{B})^{-1} \mathbf{y}</math>   <math>\mathbf{U} = (\mathbf{B})^{-1} - \frac{\mathbf{v} \mathbf{v}^\top}{\alpha + \mathbf{v}^\top \mathbf{y}}</math>   <math>\mathbf{w} = \mathbf{U} \mathbf{q}</math>, <math>(\mathbf{B})^{-1} = \mathbf{U} + \frac{\mathbf{w} \mathbf{w}^\top}{\beta - \mathbf{q}^\top \mathbf{w}}</math>   <math>\mathbf{x} = (\mathbf{B})^{-1} (\mathbf{u} - \mathbf{g})</math>   Send <math>\mathbf{x}</math> to the worker in return end Interrupt all workers Output <math>\mathbf{x}^T</math>                     </pre> | <pre> Initialize <math>\mathbf{x}_i = \mathbf{x}</math>, <math>\mathbf{B}_i</math> while not interrupted by master do   Receive <math>\mathbf{x}</math>   <math>\mathbf{s}_i = \mathbf{x} - \mathbf{z}_i</math>   <math>\mathbf{y}_i = \nabla f_i(\mathbf{x}) - \nabla f_i(\mathbf{z}_i)</math>   <math>\mathbf{q}_i = \mathbf{B}_i \mathbf{s}_i</math>   <math>\alpha = \mathbf{y}_i^\top \mathbf{s}_i</math>   <math>\beta = \mathbf{s}_i^\top \mathbf{B}_i \mathbf{s}_i</math>   <math>\mathbf{u} = \mathbf{B}_i \mathbf{z}_i</math>   <math>\mathbf{B}_i = \mathbf{B}_i + \frac{\mathbf{y}_i \mathbf{y}_i^\top}{\alpha} - \frac{\mathbf{q}_i \mathbf{q}_i^\top}{\beta}</math>   <math>\Delta \mathbf{u} = \mathbf{B}_i \mathbf{x} - \mathbf{u}</math>   <math>\mathbf{z}_i = \mathbf{x}</math>   Send <math>\Delta \mathbf{u}</math>, <math>\mathbf{y}_i</math>, <math>\mathbf{q}_i</math>, <math>\alpha</math>, <math>\beta</math> to the master end                     </pre> |

---

### A.2 Proof of Lemma 1

*Proof.* To verify the claim, we need to show that  $\mathbf{u}^t = \sum_{i=1}^n \mathbf{B}_i^t \mathbf{z}_i^t$  and  $\mathbf{g}^t = \sum_{i=1}^n \nabla f_i(\mathbf{z}_i^t)$ . They follow from our delayed vectors notation  $\mathbf{z}_i^t = \mathbf{z}_i^{t-d_i^t}$  and how  $\Delta \mathbf{u}^{t-d_i^t}$  and  $\mathbf{y}_i^{t-d_i^t}$  are computed by the corresponding worker.  $\square$

### A.3 Proof of Lemma 2

To prove the claim in Lemma 2 we first prove the following intermediate lemma using the result of Lemma 5.2 in Broyden et al. (1973b).

**Lemma 4.** Consider the proposed method outlined in Algorithm 1. Let  $\mathbf{M}$  be a nonsingular symmetric matrix such that

$$\|\mathbf{M} \mathbf{y}_i^t - \mathbf{M}^{-1} \mathbf{s}_i^t\| \leq \beta \|\mathbf{M}^{-1} \mathbf{s}_i^t\|, \quad (21)$$

for some  $\beta \in [0, 1/3]$  and vectors  $\mathbf{s}_i^t$  and  $\mathbf{y}_i^t$  in  $\mathbb{R}^p$  with  $\mathbf{s}_i^t \neq \mathbf{0}$ . Let's denote  $i$  as the index that has been updated at time  $t$ . Then, there exist positive constants  $\alpha$ ,  $\alpha_1$ , and  $\alpha_2$  such that, for any symmetric  $\mathbf{A} \in \mathbb{R}^{p \times p}$  we have,

$$\begin{aligned} \|\mathbf{B}_i^t - \mathbf{A}\|_{\mathbf{M}} \leq & \left[ (1 - \alpha \theta^2)^{1/2} + \alpha_1 \frac{\|\mathbf{M} \mathbf{y}_i^{t-D_i^t} - \mathbf{M}^{-1} \mathbf{s}_i^{t-D_i^t}\|}{\|\mathbf{M}^{-1} \mathbf{s}_i^{t-D_i^t}\|} \right] \|\mathbf{B}_i^{t-D_i^t} - \mathbf{A}\|_{\mathbf{M}} \\ & + \alpha_2 \frac{\|\mathbf{y}_i^{t-D_i^t} - \mathbf{A} \mathbf{s}_i^{t-D_i^t}\|}{\|\mathbf{M}^{-1} \mathbf{s}_i^{t-D_i^t}\|}, \end{aligned} \quad (22)$$

where  $\alpha = (1 - 2\beta)/(1 - \beta^2) \in [3/8, 1]$ ,  $\alpha_1 = 2.5(1 - \beta)^{-1}$ ,  $\alpha_2 = 2(1 + 2\sqrt{\beta})\|\mathbf{M}\|_{\mathbf{F}}$ , and

$$\theta = \frac{\|\mathbf{M}(\mathbf{B}_i^{t-D_i^t} - \mathbf{A})\mathbf{s}_i^{t-D_i^t}\|}{\|\mathbf{B}_i^{t-D_i^t} - \mathbf{A}\|_{\mathbf{M}} \|\mathbf{M}^{-1} \mathbf{s}_i^{t-D_i^t}\|} \quad \text{for } \mathbf{B}_i^{t-D_i^t} \neq \mathbf{A}, \quad \theta = 0 \quad \text{for } \mathbf{B}_i^{t-D_i^t} = \mathbf{A}. \quad (23)$$

*Proof.* By definition of delays  $d_i^t$ , the function  $f_i$  was updated at step  $t - d_i^t$  and  $\mathbf{B}_i^{t-1}$  is equal to  $\mathbf{B}_i^{t-D_i^t}$ . Considering this observation and the result of Lemma 5.2 in Broyden et al. (1973b), the claim follows.  $\square$

Note that the result in Lemma 4 characterizes an upper bound on the difference between the Hessian approximation matrices  $\mathbf{B}_i^t$  and  $\mathbf{B}_i^{t-D_i^t}$  and any positive definite matrix  $\mathbf{A}$ . Let us show that matrices  $\mathbf{M} = \nabla^2 f_i(\mathbf{x}^*)^{-1/2}$  and  $\mathbf{A} = \nabla^2 f_i(\mathbf{x}^*)$  satisfy the conditions of Lemma 4. By strong convexity of  $f_i$  we have  $\|\nabla^2 f_i(\mathbf{x}^*)^{1/2} \mathbf{s}_i^{t-D_i^t}\| \geq \sqrt{\mu} \|\mathbf{s}_i^{t-D_i^t}\|$ . Combined with Assumption 2, it gives that

$$\frac{\|\mathbf{y}_i^{t-D_i^t} - \nabla^2 f_i(\mathbf{x}^*) \mathbf{s}_i^{t-D_i^t}\|}{\|\nabla^2 f_i(\mathbf{x}^*)^{1/2} \mathbf{s}_i^{t-D_i^t}\|} \leq \frac{\tilde{L} \|\mathbf{s}_i^{t-D_i^t}\| \max\{\|\mathbf{z}_i^{t-D_i^t} - \mathbf{x}^*\|, \|\mathbf{z}_i^t - \mathbf{x}^*\|\}}{\sqrt{\mu} \|\mathbf{s}_i^{t-D_i^t}\|} = \frac{\tilde{L}}{\sqrt{\mu}} \sigma_i^t \quad (24)$$

This observation implies that the left hand side of the condition in (21) for  $\mathbf{M} = \nabla^2 f_i(\mathbf{x}^*)^{-1/2}$  is bounded above by

$$\frac{\|\mathbf{M} \mathbf{y}_i^{t-D_i^t} - \mathbf{M}^{-1} \mathbf{s}_i^{t-D_i^t}\|}{\|\mathbf{M}^{-1} \mathbf{s}_i^{t-D_i^t}\|} \leq \frac{\|\nabla^2 f_i(\mathbf{x}^*)^{-1/2}\| \|\mathbf{y}_i^{t-D_i^t} - \nabla^2 f_i(\mathbf{x}^*) \mathbf{s}_i^{t-D_i^t}\|}{\|\nabla^2 f_i(\mathbf{x}^*)^{1/2} \mathbf{s}_i^{t-D_i^t}\|} \leq \frac{\tilde{L}}{\mu} \sigma_i^t \quad (25)$$

Thus, the condition in (21) is satisfied since  $\tilde{L} \sigma_i^t / \mu < 1/3$ . Replacing the upper bounds in (24) and (25) into the expression in (22) implies the claim in (20) with

$$\beta = \frac{\tilde{L}}{\mu} \sigma_i^t, \quad \alpha = \frac{1-2\beta}{1-\beta^2}, \quad \alpha_3 = \frac{5\tilde{L}}{2\mu(1-\beta)}, \quad \alpha_4 = \frac{2(1+2\sqrt{p})\tilde{L}}{\sqrt{\mu}} \|\nabla^2 f_i(\mathbf{x}^*)^{-\frac{1}{2}}\|_{\mathbf{F}}, \quad (26)$$

and the proof is complete.

#### A.4 Proof of Lemma 3

We first state the following result from Lemma 6 in Mokhtari et al. (2018a), which shows an upper bound for the error  $\|\mathbf{x}^t - \mathbf{x}^*\|$  in terms of the gap between the delayed variables  $\mathbf{z}_i^t$  and the optimal solution  $\mathbf{x}^*$  and the difference between the Newton direction  $\nabla^2 f_i(\mathbf{x}^*) (\mathbf{z}_i^t - \mathbf{x}^*)$  and the proposed quasi-Newton direction  $\mathbf{B}_i^t (\mathbf{z}_i^t - \mathbf{x}^*)$ .

**Lemma 5.** *If Assumptions 1 and 2 hold, then the sequence of iterates generated by Algorithm 1 satisfies*

$$\|\mathbf{x}^t - \mathbf{x}^*\| \leq \frac{\tilde{L}\Gamma^t}{n} \sum_{i=1}^n \|\mathbf{z}_i^t - \mathbf{x}^*\|^2 + \frac{\Gamma^t}{n} \sum_{i=1}^n \|(\mathbf{B}_i^t - \nabla^2 f_i(\mathbf{x}^*)) (\mathbf{z}_i^t - \mathbf{x}^*)\|, \quad (27)$$

where  $\Gamma^t := \|((1/n) \sum_{i=1}^n \mathbf{B}_i^t)^{-1}\|$ .

We use the result in Lemma 5 to prove the claim of Lemma 3. We will prove the claimed convergence rate in Lemma 3 together with an additional claim

$$\|\mathbf{B}_i^t - \nabla^2 f_i(\mathbf{x}^*)\|_{\mathbf{M}} \leq 2\delta$$

by inductions on  $m$  and on  $t \in [T_m, T_{m+1})$ . The base case of our induction is  $m = 0$  and  $t = 0$ , which is the initialization step, so let us start with it.

Since all norms in finite dimensional spaces are equivalent, there exists a constant  $\eta > 0$  such that  $\|\mathbf{A}\| \leq \eta \|\mathbf{A}\|_{\mathbf{M}}$  for all  $\mathbf{A}$ . Define  $\gamma := 1/\mu$  and  $d := \max_m (T_{m+1} - T_m)$ , and assume that  $\epsilon(r) = \epsilon$  and  $\delta(r) = \delta$  are chosen such that

$$(2\alpha_3\delta + \alpha_4) \frac{d\epsilon}{1-r} \leq \delta \quad \text{and} \quad \gamma(1+r)[\tilde{L}\epsilon + 2\eta\delta] \leq r, \quad (28)$$

where  $\alpha_3$  and  $\alpha_4$  are the constants from Lemma 2. As  $\|\mathbf{B}_i^0 - \nabla^2 f_i(\mathbf{x}^*)\|_{\mathbf{M}} \leq \delta$ , we also have

$$\|\mathbf{B}_i^0 - \nabla^2 f_i(\mathbf{x}^*)\| \leq \eta\delta.$$

Therefore, by triangle inequality from  $\|\nabla^2 f_i(\mathbf{x}^*)\| \leq L$  we obtain  $\|\mathbf{B}_i^0\| \leq \eta\delta + L$ , so  $\|(1/n) \sum_{i=1}^n \mathbf{B}_i^0\| \leq \eta\delta + L$ . The second part of inequality (28) also implies  $2\gamma(1+r)\eta\delta \leq r$ . Moreover, it holds that  $\|\mathbf{B}_i^0 - \nabla^2 f_i(\mathbf{x}^*)\| \leq \eta\delta < 2\eta\delta$  and by Assumption 1  $\gamma \geq \|\nabla^2 f_i(\mathbf{x}^*)^{-1}\|$ , so we obtain by Banach Lemma that

$$\|(\mathbf{B}_i^0)^{-1}\| \leq (1+r)\gamma.$$

We formally prove this result in the following lemma.

**Lemma 6.** *If the Hessian approximation  $\mathbf{B}_i$  satisfies the inequality  $\|\mathbf{B}_i - \nabla^2 f_i(\mathbf{x}^*)\| \leq 2\eta\delta$  and  $\|\nabla^2 f_i(\mathbf{x}^*)^{-1}\| \leq \gamma$ , then we have  $\|\mathbf{B}_i^{-1}\| \leq (1+r)\gamma$ .*

*Proof.* Note that according to Banach Lemma, if a matrix  $\mathbf{A}$  satisfies the inequality  $\|\mathbf{A} - \mathbf{I}\| \leq 1$ , then it holds  $\|\mathbf{A}^{-1}\| \leq \frac{1}{1-\|\mathbf{A}-\mathbf{I}\|}$ .

We first show that  $\|\nabla^2 f_i(\mathbf{x}^*)^{-1/2} \mathbf{B}_i \nabla^2 f_i(\mathbf{x}^*)^{-1/2} - \mathbf{I}\| \leq 1$ . To do so, note that

$$\begin{aligned} \|\nabla^2 f_i(\mathbf{x}^*)^{-1/2} \mathbf{B}_i \nabla^2 f_i(\mathbf{x}^*)^{-1/2} - \mathbf{I}\| &\leq \|\nabla^2 f_i(\mathbf{x}^*)^{-1/2}\| \|\mathbf{B}_i - \nabla^2 f_i(\mathbf{x}^*)\| \|\nabla^2 f_i(\mathbf{x}^*)^{-1/2}\| \\ &\leq 2\eta\delta\gamma \\ &\leq \frac{r}{r+1} \\ &< 1. \end{aligned} \tag{29}$$

Now using this result and Banach Lemma we can show that

$$\begin{aligned} \|\nabla^2 f_i(\mathbf{x}^*)^{1/2} \mathbf{B}_i^{-1} \nabla^2 f_i(\mathbf{x}^*)^{1/2}\| &\leq \frac{1}{1 - \|\nabla^2 f_i(\mathbf{x}^*)^{-1/2} \mathbf{B}_i \nabla^2 f_i(\mathbf{x}^*)^{-1/2} - \mathbf{I}\|} \\ &\leq \frac{1}{1 - \frac{r}{r+1}} \\ &= 1 + r \end{aligned} \tag{30}$$

Further, we know that

$$\|\nabla^2 f_i(\mathbf{x}^*)^{1/2} \mathbf{B}_i^{-1} \nabla^2 f_i(\mathbf{x}^*)^{1/2}\| \geq \frac{\|\mathbf{B}_i^{-1}\|}{\gamma} \tag{31}$$

By combining these results we obtain that

$$\|\mathbf{B}_i^{-1}\| \leq (1+r)\gamma. \tag{32}$$

□

Similarly, for matrix  $((1/n) \sum_{i=1}^n \mathbf{B}_i^0)^{-1}$  we get from  $\|(1/n) \sum_{i=1}^n \mathbf{B}_i^0 - (1/n) \sum_{i=1}^n \nabla^2 f_i(\mathbf{x}^*)\| \leq (1/n) \sum_{i=1}^n \|\mathbf{B}_i^0 - \nabla^2 f_i(\mathbf{x}^*)\| \leq \eta\delta$  and  $\|\nabla^2 f(\mathbf{x}^*)^{-1}\| \leq \gamma$  that

$$\left\| \left( \frac{1}{n} \sum_{i=1}^n \mathbf{B}_i^0 \right)^{-1} \right\| \leq (1+r)\gamma.$$

We have by Lemma 2 and induction hypothesis

$$\begin{aligned} \|\mathbf{B}_i^t - \nabla^2 f_i(\mathbf{x}^*)\|_{\mathbf{M}} - \|\mathbf{B}_i^{t-D_i^t} - \nabla^2 f_i(\mathbf{x}^*)\|_{\mathbf{M}} &\leq \alpha_3 \sigma_i^{t-D_i^t} \|\mathbf{B}_i^{t-D_i^t} - \nabla^2 f_i(\mathbf{x}^*)\|_{\mathbf{M}} + \alpha_4 \sigma_i^{t-D_i^t} \\ &\leq (\alpha_3 \|\mathbf{B}_i^{t-D_i^t} - \nabla^2 f_i(\mathbf{x}^*)\|_{\mathbf{M}} + \alpha_4) r^{m-1} \epsilon \\ &\leq (2\alpha_3\delta + \alpha_4) r^{m-1} \epsilon, \end{aligned}$$

By summing this inequality over all moments in the current epoch when worker  $i$  performed its update, we obtain that

$$\|\mathbf{B}_i^t - \nabla^2 f_i(\mathbf{x}^*)\|_{\mathbf{M}} - \left\| \mathbf{B}_i^{T_m - d_i^{T_m}} - \nabla^2 f_i(\mathbf{x}^*) \right\|_{\mathbf{M}} \leq (2\alpha_3\delta + \alpha_4) d r^{m-1} \epsilon,$$

Summing the new bound again, but this time over all passed epoch, we obtain

$$\|\mathbf{B}_i^t - \nabla^2 f_i(\mathbf{x}^*)\|_{\mathbf{M}} - \|\mathbf{B}_i^0 - \nabla^2 f_i(\mathbf{x}^*)\|_{\mathbf{M}} \leq (2\alpha_3\delta + \alpha_4) d \epsilon \sum_{k=0}^{m-1} r^k \leq \frac{(2\alpha_3\delta + \alpha_4) d \epsilon}{1-r} \leq \delta.$$

Therefore,  $\|\mathbf{B}_i^t - \nabla^2 f_i(\mathbf{x}^*)\|_{\mathbf{M}} \leq 2\delta$ . By using the Banach argument again, we can show that  $\|(\frac{1}{n} \sum_{i=1}^n \mathbf{B}_i^t)^{-1}\| \leq (1+r)\gamma$ . Using this result, for any  $t \in [T_m, T_{m+1})$  we have  $z_i^t = x^{t-D_i^t} \in [T_{m-1}, t)$  and we can write

$$\begin{aligned} \|\mathbf{x}^t - \mathbf{x}^*\| &\leq (1+r)\gamma \left[ \frac{\tilde{L}}{n} \sum_{i=1}^n \|\mathbf{z}_i^t - \mathbf{x}^*\|^2 + \frac{1}{n} \sum_{i=1}^n \|[\mathbf{B}_i^t - \nabla^2 f_i(\mathbf{x}^*)](\mathbf{z}_i^t - \mathbf{x}^*)\| \right] \\ &\leq (1+r)\gamma \left[ \tilde{L}\epsilon + 2\eta\delta \right] \max_i \|\mathbf{z}_i^t - \mathbf{x}^*\| \\ &\leq r \max_i \|\mathbf{z}_i^t - \mathbf{x}^*\| \\ &\leq r^m \|\mathbf{x}^0 - \mathbf{x}^*\|. \end{aligned} \tag{33}$$

### A.5 Proof of Theorem 1

Dividing both sides of (27) by  $(1/n) \sum_{i=1}^n \|\mathbf{z}_i^t - \mathbf{x}^*\|$ , we get

$$\frac{\|\mathbf{x}^t - \mathbf{x}^*\|}{\frac{1}{n} \sum_{i=1}^n \|\mathbf{z}_i^t - \mathbf{x}^*\|} \leq \tilde{L}\Gamma^t \frac{\sum_{i=1}^n \|\mathbf{z}_i^t - \mathbf{x}^*\|^2}{\sum_{i=1}^n \|\mathbf{z}_i^t - \mathbf{x}^*\|} + \Gamma^t \frac{\sum_{i=1}^n \|(\mathbf{B}_i^t - \nabla^2 f_i(\mathbf{x}^*))(\mathbf{z}_i^t - \mathbf{x}^*)\|}{\sum_{i=1}^n \|\mathbf{z}_i^t - \mathbf{x}^*\|} \tag{34}$$

As every term in  $\sum_{i=1}^n \|\mathbf{z}_i^t - \mathbf{x}^*\|$  is non-negative, the upper bound in (34) will remain valid if we keep only one summand out of the whole sum in the denominators of the right-hand side, so

$$\begin{aligned} \frac{\|\mathbf{x}^t - \mathbf{x}^*\|}{\frac{1}{n} \sum_{i=1}^n \|\mathbf{z}_i^t - \mathbf{x}^*\|} &\leq \tilde{L}\Gamma^t \sum_{i=1}^n \frac{\|\mathbf{z}_i^t - \mathbf{x}^*\|^2}{\|\mathbf{z}_i^t - \mathbf{x}^*\|} + \Gamma^t \sum_{i=1}^n \frac{\|(\mathbf{B}_i^t - \nabla^2 f_i(\mathbf{x}^*))(\mathbf{z}_i^t - \mathbf{x}^*)\|}{\|\mathbf{z}_i^t - \mathbf{x}^*\|} \\ &= \tilde{L}\Gamma^t \sum_{i=1}^n \|\mathbf{z}_i^t - \mathbf{x}^*\| + \Gamma^t \sum_{i=1}^n \frac{\|(\mathbf{B}_i^t - \nabla^2 f_i(\mathbf{x}^*))(\mathbf{z}_i^t - \mathbf{x}^*)\|}{\|\mathbf{z}_i^t - \mathbf{x}^*\|}. \end{aligned} \tag{35}$$

Now using the result in Lemma 5 of Mokhtari et al. (2018a), the second sum in (35) converges to zero. Further,  $\Gamma^t$  is bounded above by a positive constant. Hence, by computing the limit of both sides in (35) we obtain

$$\lim_{t \rightarrow \infty} \frac{\|\mathbf{x}^t - \mathbf{x}^*\|}{\frac{1}{n} \sum_{i=1}^n \|\mathbf{z}_i^t - \mathbf{x}^*\|} = 0.$$

Therefore, if  $T$  is big enough, for  $t > T$  we have

$$\|\mathbf{x}^t - \mathbf{x}^*\| \leq \frac{1}{n} \sum_{i=1}^n \|\mathbf{z}_i^t - \mathbf{x}^*\| = \frac{1}{n} \sum_{i=1}^n \|\mathbf{x}_i^{t-D_i^t} - \mathbf{x}^*\| \leq \max_i \|\mathbf{x}_i^{t-D_i^t} - \mathbf{x}^*\|. \tag{36}$$

Now, let  $t_0 = t_0(m) := \min\{\tilde{t} \in [T_{m+1}, T_{m+2}) : \|\mathbf{x}^{\tilde{t}} - \mathbf{x}^*\| = \max_{t \in [T_{m+1}, T_{m+2})} \|\mathbf{x}^t - \mathbf{x}^*\|\}$ . In other words,  $t_0$  is the first moment in epoch  $m+1$  attaining the maximal distance from  $\mathbf{x}^*$ . Then, for all  $t \in [T_{m+1}, t_0)$  we have  $\|\mathbf{x}^t - \mathbf{x}^*\| < \|\mathbf{x}^{t_0} - \mathbf{x}^*\|$ . Furthermore, from equation (36) and the fact that, according to Proposition 1,  $t_0 - D_i^{t_0} \in [T_m, t_0)$  we get

$$\max_{t \in [T_{m+1}, T_{m+2})} \|\mathbf{x}^t - \mathbf{x}^*\| = \|\mathbf{x}^{t_0} - \mathbf{x}^*\| \leq \max_i \left\| \mathbf{x}_i^{t_0 - D_i^{t_0}} - \mathbf{x}^* \right\| \leq \max_{t \in [T_m, t_0)} \|\mathbf{x}^t - \mathbf{x}^*\|.$$

Note that it can not happen that  $\max_{t \in [T_m, t_0)} \|\mathbf{x}^t - \mathbf{x}^*\| = \max_{t \in [T_{m+1}, t_0)} \|\mathbf{x}^t - \mathbf{x}^*\|$  as that would mean that there exists a  $\hat{t} \in [T_{m+1}, t_0)$  such that  $\|\mathbf{x}^{\hat{t}} - \mathbf{x}^*\| \geq \|\mathbf{x}^{t_0} - \mathbf{x}^*\|$ , which we made impossible when defining  $t_0$ . Then, the only option is that in fact

$$\max_{t \in [T_m, t_0)} \|\mathbf{x}^t - \mathbf{x}^*\| = \max_{t \in [T_m, T_{m+1})} \|\mathbf{x}^t - \mathbf{x}^*\|.$$

Finally,

$$\begin{aligned}
\lim_{t \rightarrow \infty} \frac{\max_{t \in [T_{m+1}, T_{m+2}]} \|\mathbf{x}^t - \mathbf{x}^*\|}{\max_{t \in [T_m, T_{m+1}]} \|\mathbf{x}^t - \mathbf{x}^*\|} &= \lim_{t \rightarrow \infty} \frac{\|\mathbf{x}^{t_0(m)} - \mathbf{x}^*\|}{\max_{t \in [T_m, T_{m+1}]} \|\mathbf{x}^t - \mathbf{x}^*\|} \\
&= \lim_{t \rightarrow \infty} \frac{\|\mathbf{x}^{t_0(m)} - \mathbf{x}^*\|}{\max_{t \in [T_m, t_0(m)]} \|\mathbf{x}^t - \mathbf{x}^*\|} \\
&\leq \lim_{t \rightarrow \infty} \frac{\|\mathbf{x}^{t_0(m)} - \mathbf{x}^*\|}{\max_i \|\mathbf{x}^{t_0(m) - D_i^{t_0(m)}} - \mathbf{x}^*\|} \\
&\leq \lim_{t \rightarrow \infty} \frac{\|\mathbf{x}^{t_0(m)} - \mathbf{x}^*\|}{\frac{1}{n} \sum_{i=1}^n \|\mathbf{z}_i^{t_0(m)} - \mathbf{x}^*\|} = 0,
\end{aligned}$$

where at the last step we used again the fact that  $\mathbf{z}_i^t = \mathbf{x}^{t - D_i^t}$ .

## B Implementation of Dave-QN

In Algorithm 2, we provide a simplified version of the Dave-QN in terms of notation and indices of the variables, which illustrates how Dave-QN can be implemented from master's and worker nodes' side further. We observe that steps at worker  $i$  is devoted to performing the update in (11). Using the computed matrix  $\mathbf{B}_i$ , node  $i$  evaluates the vector  $\Delta \mathbf{u}$ . Then, it sends the vectors  $\Delta \mathbf{u}$ ,  $\mathbf{y}_i$ , and  $\mathbf{q}_i$  as well as the scalars  $\alpha$  and  $\beta$  to the master node. The master node uses the variation vectors  $\Delta \mathbf{u}$  and  $\mathbf{y}$  to update  $\mathbf{u}$  and  $\mathbf{g}$ . Then, it performs the update  $\mathbf{x}^{t+1} = (\mathbf{B}^{t+1})^{-1} (\mathbf{u}^{t+1} - \mathbf{g}^{t+1})$  by following the efficient procedure presented in (16)–(17).
